# Supplementary material for: Influence of simulated future climate CO2 scenarios on carbon allocation in keystone Cyanobacterium Synechococcus
Source: Research Square preprint supplement (doi:10.21203/rs.3.rs-6676455/v1), 2025-05-23
Supplement: Supplementary file 1 [file f54c1e2fe5b968617bbbdd0d.docx]

**Influence of simulated future climate CO2 scenarios on carbon allocation in keystone Cyanobacterium *Synechococcus​***

**Running title:** Carbon allocation response of *Synechococcus* to elevated CO2

**Authors’ names:**

Yanyan Zhang1,2,3·Lincheng Huang4·Yongxin Liu4·Tangcheng Li3·Hong Du3·Faming Wang1,2·Zhe Lu1,2*

**Authors’ affiliations:**

1. Guangdong Provincial Key Laboratory of Applied Botany, Xiaoliang Research Station for Tropical Coastal Ecosystems, and Key Laboratory of Vegetation Restoration and Management of Degraded Ecosystems, South China Botanical Garden, Chinese Academy of Sciences, Guangzhou, 510650, P. R. China

2. South China National Botanical Garden, Guangzhou, 510650, P. R. China

3. Guangdong Provincial Key Laboratory of Marine Disaster Prediction and Prevention, Shantou University, Shantou, 515000, P.R. China

4. College of Marine Sciences, South China Agricultural University, Guangzhou, 510650, P.R. China

*Corresponding author:

Zhe Lu: luzhe@scbg.ac.cn, Tel: +86-2037252905

**Conflicts of interest**

The authors declare no competing financial interests.

**Supplementary methods and materials**

**1. Growth patterns of *Synechococcus* sp*.* under different CO2 concentrations**

Under the three CO2 concentrations (400, 850, and 1370 ppm), the Chl-*a* contents of *Synechococcus* sp. FACHB-410 exhibited both similarities and differences in temporal dynamics over the 31-day cultivation period (Figure S1). In terms of similarities, regardless of CO2 concentration, the Chl-*a* of FACHB-410 gradually increased, entering a rapid growth phase between days 10 and 17. In addition, no significant differences in Chl-*a* contents were observed among the three experimental groups during the first 24 days of cultivation (*p >* 0.05). However, differences emerged as CO2 concentration increased. After 31 days of cultivation, the biomass of *Synechococcus* sp. FACHB-410 exhibited a significant increase with higher CO2 levels. Specifically, at 1370 ppm, the Chl-*a* reached 4.44 ± 0.23 mg L-1, which was significantly higher than that at 850 ppm (an increase of 44%) and at 400 ppm (an increase of 61%) (*p* < 0.05, Figure S1).

**Table S1** The composition table of BG-11 medium

| Compounds | mg L-1 dH2O |
| --- | --- |
|  |
| NaNO3 | 1500 |  |
|  |
| K2HPO4 | 40 |  |
|  |
| MgSO4·7H2O | 75 |  |
|  |
| CaCl2·2H2O | 36 |  |
|  |
| Citric acid | 6 |  |
|  |
| Ferric ammonium citrate | 6 |  |
|  |
| EDTANa2 | 1 |  |
|  |
| H3BO3 | 2.86 |  |
|  |
| MnCl2·4H2O | 1.86 |  |
|  |
| ZnSO4·7H2O | 0.22 |  |
|  |
| Na2MoO4·2H2O | 0.39 |  |
|  |
| CuSO4·5H2O | 0.08 |  |
|  |
| Co(NO3)2·6H2O | 0.05 |  |
|  |
| Adjust PH to 7.1 with 1M NaOH or HCl | |  |
|  |


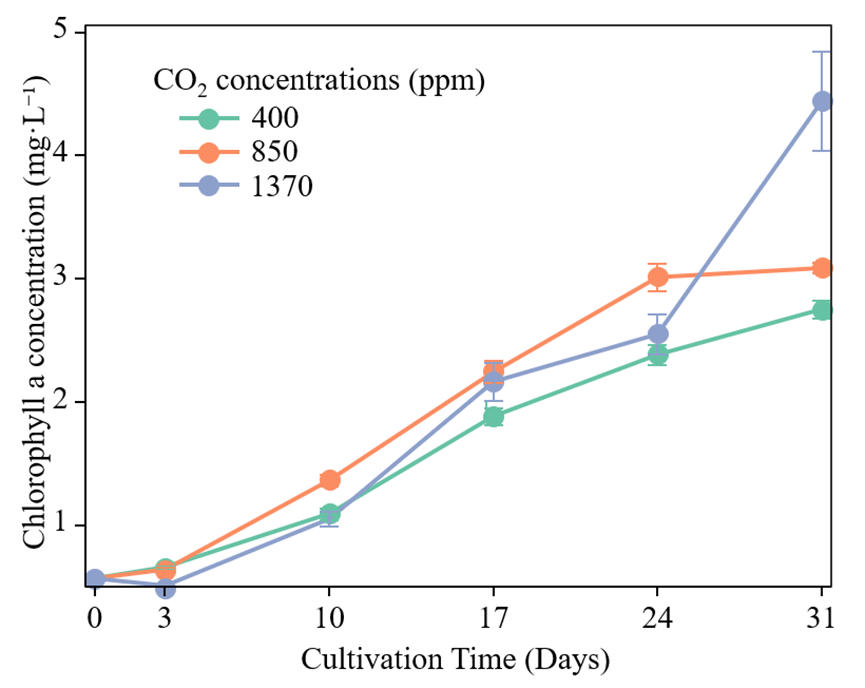


Figure S1. The growth performance of *Synechococcus* sp. FACHB-410 at three ambient CO2 concentrations. Data was indicated as means ± SE (n = 3).
